# Supplementary material
Source: Elsevier journal article supplement (https://www.sciencedirect.com/science/article/pii/S1138359318300066)
Supplement: mmc1 [file S1138359318300066:mmc1.docx]

**ANEXO I**

001 Edad: <35 / 35-45 / >45-55 / >55

002 Sexo: M / F

003 Años de ejercicio: <10 / 10-25 / >25

004 Comunidad Autónoma:

005 Ámbito de ejercicio: rural / semiurbano / urbano

006 Número de Pacientes/ día: <30 / 30-50 / >50

007 ¿Cuál es tu cupo actual?: <1200 / 1200-1500 / 1500-1800 / >1800

008 ¿Cuántos pacientes >65 años tienes en tu cupo?: <300 / 300-500 / >500

009 ¿Existe alguna actividad formativa promovida por la Administración en fármacos biológicos y/o biosimilares en su zona de trabajo?: Si / No

0091 Explica qué tipo de actividad:

010 ¿Has recibido información por parte de alguna entidad ajena a la Administración en relación a fármacos biosimilares?: Si / No

0101 Explica quien:

011 ¿Conoces las diferencias entre un fármaco biológico original y un biosimilar?: Si / No

012 Por favor, clasifica de 0 a 10 el grado de formación que posees en el campo de los biosimilares, asignando 0 a un grado inexistente y 10 a un grado excelente:

013 ¿Sabrías definir qué es un fármaco biosimilar?: (Marca solo una respuesta)

Una copia idéntica de un fármaco biológico cuya patente ha expirado

Un fármaco que incluye una versión del principio activo de un fármaco biológico cuya patente ha expirado

Un fármaco distinto del original pero con las mismas indicaciones porque es semejante

No sabría

014 ¿Conoces el marco regulatorio y legal en España para el manejo de fármacos biológicos originales y biosimilares?: Si / No

015 ¿El manejo clínico de medicamentos biosimilares podría equipararse al manejo de los medicamentos genéricos?: Si / No / No lo sé

016 ¿El programa clínico que desarrolla un medicamento biosimilar es distinto al que superan los biológicos innovadores?: Si / No / No lo sé

017 ¿Estás de acuerdo con la siguiente afirmación?:

El desarrollo clínico de los biosimilares no está dirigido a demostrar beneficio clínico per se, sino comparabilidad con biológico innovador: Si / No / No lo sé

018 Según tu opinión ¿Se pueden extrapolar al biosimilar algunas de las indicaciones del medicamento original de referencia sin datos clínicos de eficacia y seguridad en esas indicaciones?:

Si / No / No lo sé

019 ¿Estás de acuerdo con la siguiente afirmación?:

La seguridad del paciente requiere un programa mantenido de fármaco-vigilancia, aspecto que puede estar comprometido por la sustitución automática del medicamento:

Si / No / No lo sé

020 ¿Estás de acuerdo con la siguiente afirmación?:

Como cualquier nuevo medicamento biológico, el biosimilar queda sometido tras su autorización a un seguimiento especial de farmacovigilancia durante 5 años (triángulo negro), período en el que se deberá completar la caracterización de su seguridad e inmunogenicidad mediante un programa de farmacovigilancia propio:

Si / No / No lo sé

021 ¿Conoces qué monitorización hay que realizar a los pacientes en tratamiento con fármacos biológicos con un seguimiento especial de farmacovigilancia (triángulo negro)?:

Si / No

022 Los fármacos biológicos incluidos los biosimilares:

Pueden recetarse por principio activo o marca comercial

Deben recetarse por principio activo siempre

Deben recetarse por marca comercial siempre

No lo sé

023 Los fármacos biológicos originales y biosimilares:

Pueden ser sustituidos en la farmacia

Sólo pueden ser sustituidos en la farmacia hospitalaria y por acuerdo de la comisión farmacoterapéutica

No pueden ser sustituidos en ningún caso sin el expreso consentimiento del médico prescriptor

No lo sé

024 Según tu opinión ¿la intercambiabilidad y sustitución de los medicamentos biológicos originales en España está bien regulada?: Si / No / No lo sé

025 ¿Conoces algún fármaco biosimilar aprobado en España para la utilización en pacientes de atención primaria?: Si / No

026 En caso de respuesta afirmativa, ¿en cuál de las siguientes patologías?:

Asma bronquial / Diabetes / Hipertensión arterial / Artrosis

027 A tu criterio ¿Cuál de las siguientes razones justificaría la utilización del biosimilar en lugar del biológico original en la patología anterior?:

Eficacia y seguridad semejante al fármaco de referencia

Precio

Por las dos anteriores

028 A tu criterio ¿Cuál de las siguientes razones justificaría la NO utilización del biosimilar en lugar del original en la patología anterior?:

Dudas sobre eficacia y/o seguridad

Desconocimiento

Experiencia a largo plazo con el fármaco innovador

Por todas las anteriores

029 ¿Tienes experiencia en la prescripción de medicamentos biosimilares?: Si / No

030 Si prescribes o prescribieras medicamentos biosimilares sería en pacientes:

Ya tratados con el original de referencia (intercambio)

En pacientes nuevos

En todos

En ninguno

031 ¿Crees que los biosimilares contribuyen a la sostenibilidad del sistema?:

Si / No / No lo sé

032 ¿Crees que es más barato el biosimilar que el original de referencia?:

Sí, siempre. Los biosimilares y los originales no forman conjunto de referencia

No, en ningún caso. El biosimilar y el original tienen el mismo precio porque forman conjuntos de precios de referencia

Sí, pero sólo hasta que se forma el conjunto de precios de referencia

No lo sé

033 ¿Te gustaría recibir formación en biológicos y biosimilares?: Si / No

034 En caso de respuesta afirmativa, ¿Cómo te gustaría recibir la formación?:

En el centro de salud / Utilización de nuevas tecnologías (cursos online) / Jornadas o Congresos / Otro
